# Supplementary material
Source: PubMed Central journal article supplement (PMC5837928)
Supplement: NIHMS927566-supplement.pdf [file NIHMS927566-supplement.pdf]

**Supplemental Table.** Characteristics table with the mean (SD) listed for the continuous variables and count (%) for the categorical variables.

|                                      | MCSA non-imaged<br>n = 1918 | MCSA imaged<br>n = 2095 | P-value |
|--------------------------------------|-----------------------------|-------------------------|---------|
| <b>Demographics</b>                  |                             |                         |         |
| Age, years                           | 73.7 (11.3)                 | 72.0 (10.2)             | <.001   |
| Males, no. (%)                       | 931 (49%)                   | 1091 (52%)              | .025    |
| E4 Carrier, no. (%)                  | 497 (27%)                   | 595 (29%)               | .45     |
| Education, years                     | 14.3 (2.8)                  | 14.6 (2.7)              | <.001   |
| Short Test of Mental Status<br>Score | 33.8 (4.0)                  | 34.6 (3.1)              | <.001   |
| Cognitively Normal, no. (%)          | 1521 (83%)                  | 1838 (88%)              | <.001   |
| <b>Vascular</b>                      |                             |                         |         |
| Hypertension, no. (%)                | 1386 (72%)                  | 1350 (64%)              | <.001   |
| Arterial Fibrillation, no. (%)       | 331 (17%)                   | 215 (10%)               | <.001   |
| Dyslipidemia, no. (%)                | 1537 (80%)                  | 1692 (81%)              | .44     |
| Diabetes, no. (%)                    | 388 (20%)                   | 367 (18%)               | .028    |
| Smoker (never), no. (%)              | 1031 (54%)                  | 1125 (54%)              | .96     |
| Smoker (former), no. (%)             | 799 (42%)                   | 871 (42%)               |         |
| Smoker (current), no. (%)            | 87 (5%)                     | 99 (5%)                 |         |

P-values for differences between groups come from a t-test for the continuous variables or a chi-squared test for the categorical variables.
